# Supplementary material
Source: MDPI journal article supplement (https://www.mdpi.com/2076-3417/10/20/7247)

10 Mart 2020

**Sayın Doç. Dr. Ercan IŞIK**  
*Bitlis Eren Üniversitesi  
Mühendislik-Mimarlık Fakültesi  
İnşaat Mühendisliği Bölümü Merkez/BİTLİS*

Türkiye Deprem Tehlike Haritası'nın kullanımına ilişkin izin talebiniz ile ilgili olarak, aşağıdaki şekilde gösterilmekte olan "Türkiye Deprem Tehlike Haritası"nı, üzerinde herhangi bir değişiklik yapmadan, bir parçasını gösterir biçimde değil bir bütün olarak ve "AFAD, 2018. Türkiye Deprem Tehlike Haritası" şeklinde kaynak belirterek, farklı ulusal/uluslararası hakemli dergiler ve lisansüstü tezlerde yayımlanacak olan "Bölgesel Bazda Deprem Parametrelerinin Yapı Performansına Etkisi" başlıklı çalışmanızda kullanabileceğinizi, bu haritanın telif ve iktibas hakkının Afet ve Acil Durum Yönetimi Başkanlığı'na ait olduğunu bildiririm.

**Dr. Murat NURLU**  
*Deprem Dairesi Başkanı*

*T.C. İçişleri Bakanlığı  
Afet ve Acil Durum Yönetimi Başkanlığı*

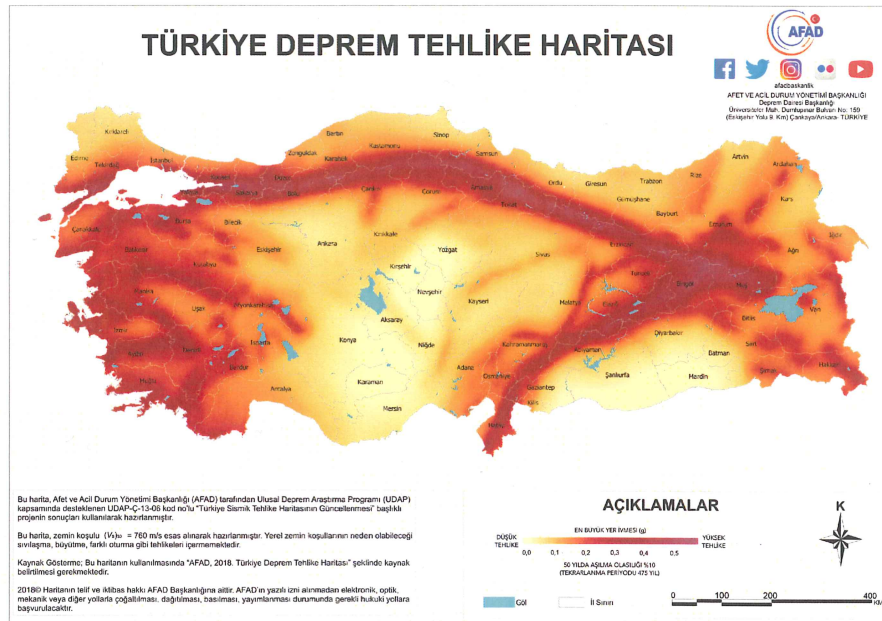

Supplement: s1 [file s1]
